# Supplementary material for: Intramuscular injection of vectorized-scFvMC1 reduces pathological tau in two different tau transgenic models
Source: Springer Nature journal article supplement (doi:10.1186/s40478-020-01003-7), 2020-08-06

**Kidney**

**Liver**

**Tibialis muscle**

**Heart**

**Control**

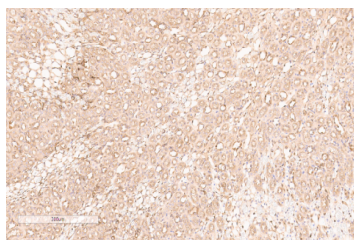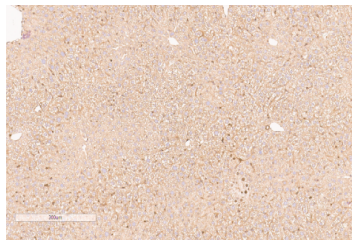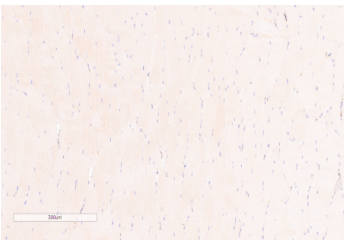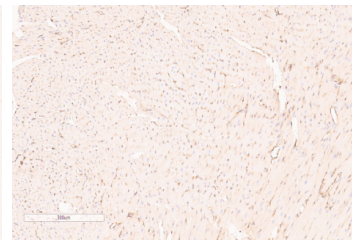

**AAV1-scFvMC1**

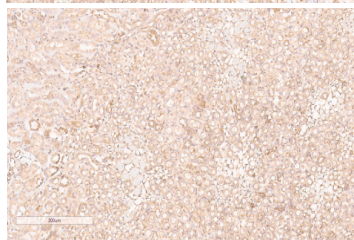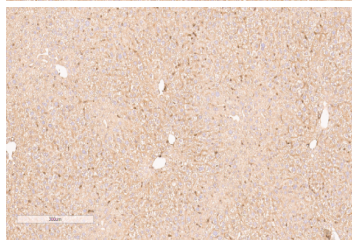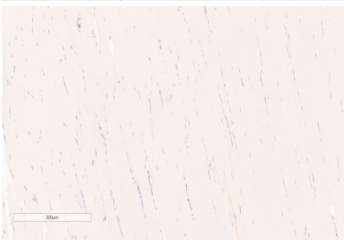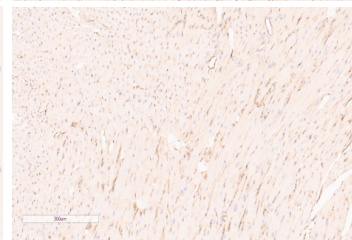

Supplement: MOESM1 [file 25667288]
