# Supplementary material for: Intramuscular injection of vectorized-scFvMC1 reduces pathological tau in two different tau transgenic models
Source: Springer Nature journal article supplement (doi:10.1186/s40478-020-01003-7), 2020-08-06

**a****P301S**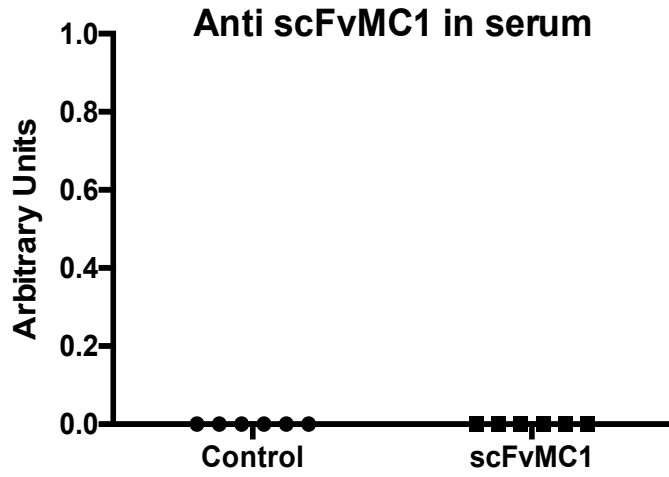**b****JNPL3**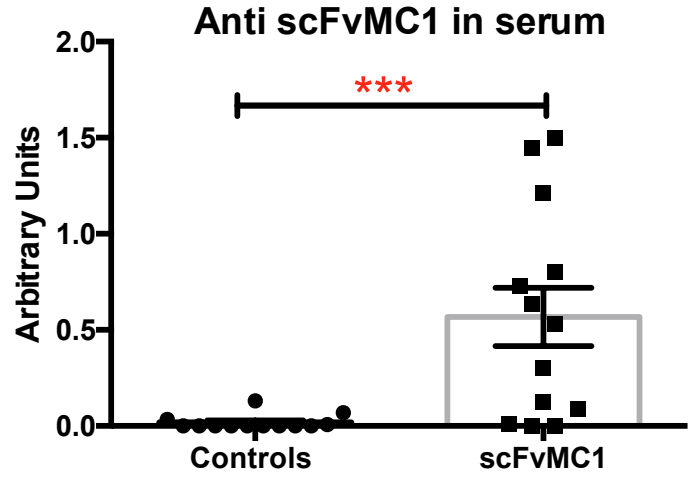**c****P301S**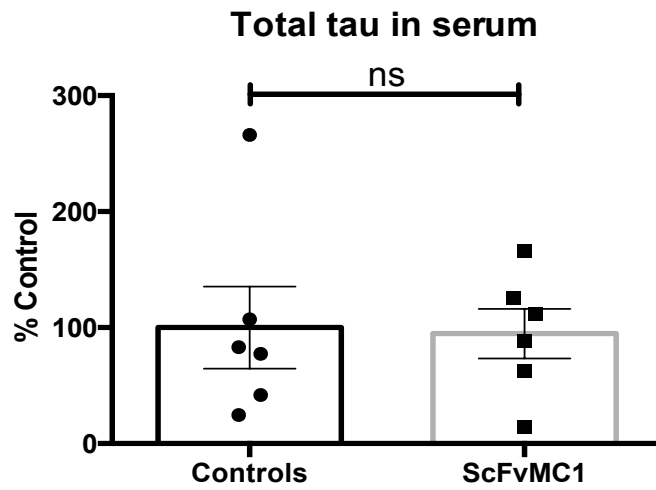**d****JNPL3**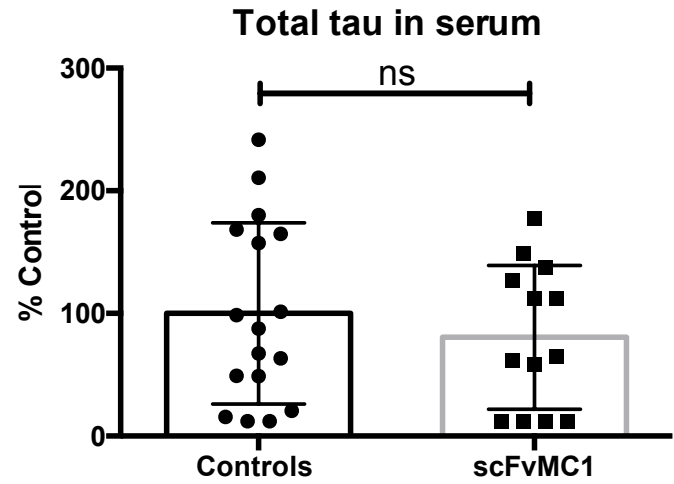

Supplement: MOESM3 [file 25667288]
